# Supplementary material for: Response of adult honey bees treated in larval stage with prochloraz to infection with Nosema ceranae
Source: PeerJ. 2019 Feb 8;7:e6325. doi: 10.7717/peerj.6325 (PMC6371917; doi:10.7717/peerj.6325)
Supplement: Data S1 — Raw data: Ct values of qPCR for tested genes. [file peerj-07-6325-s001.xlsx]

## Sheet: Housekeeping
Sample Name	Treatment	DAYS	CT RPS5			Gen name	Efficiency
CC0_1	CC	0	25.3455			RPS5	2.01
CC0_1	CC	0	25.4947
CC0_2	CC	0	25.8087			Abaecin	2.04
CC0_2	CC	0	25.7853			Basket	1.97
CC0_3	CC	0	27.6202			cactus	1.99
CC0_3	CC	0	27.621			Defensin1	2.01
CC0_4	CC	0	25.1064			Defensin2	1.96
CC0_4	CC	0	25.2371			Domeless	2.04
CC0_5	CC	0	27.6919			Dorsal	1.99
CC0_5	CC	0	27.694			Kayak	1.98
CC6_1	CC	6	26.8312			Lys2	2.02
CC6_1	CC	6	26.881			PGRPSC4300	2.05
CC6_2	CC	6	27.5257			PKA_C1	1.98
CC6_2	CC	6	27.8217			PKA-R1	1.99
CC6_3	CC	6	28.507			Spaetzle	2.01
CC6_3	CC	6	28.5452			Toll	2
CC6_4	CC	6	28.4425			Hopscotch	2.03
CC6_4	CC	6	28.3228			PGRPLC710	2.04
CC6_5	CC	6	27.9334
CC6_5	CC	6	28.0777
CC9_1	CC	9	28.9012
CC9_1	CC	9	29.1052
CC9_2	CC	9	28.1969
CC9_2	CC	9	28.5719
CC9_3	CC	9	29.9977
CC9_3	CC	9	29.9313
CC9_4	CC	9	28.7333
CC9_4	CC	9	28.5814
CC9_5	CC	9	30.2321
CC9_5	CC	9	30.4015
CC15_1	CC	15	23.8089
CC15_1	CC	15	23.88
CC15_2	CC	15	28.7712
CC15_2	CC	15	28.6575
CC15_3	CC	15	29.1326
CC15_3	CC	15	29.2627
CC15_4	CC	15	23.2594
CC15_4	CC	15	23.2167
CC15_5	CC	15	27.483
CC15_5	CC	15	27.5615
CN6_1	CN	6	27.4436
CN6_1	CN	6	27.3868
CN6_2	CN	6	28.0846
CN6_2	CN	6	28.1997
CN6_3	CN	6	28.9745
CN6_3	CN	6	28.832
CN6_4	CN	6	28.4268
CN6_4	CN	6	28.6206
CN6_5	CN	6	27.4796
CN6_5	CN	6	27.6553
CN9_1	CN	9	30.7115
CN9_1	CN	9	30.6593
CN9_2	CN	9	30.0139
CN9_2	CN	9	30.8028
CN9_3	CN	9	26.3903
CN9_3	CN	9	26.6647
CN9_4	CN	9	28.9164
CN9_4	CN	9	28.8377
CN9_5	CN	9	27.5993
CN9_5	CN	9	27.2868
CN15_1	CN	15	26.0444
CN15_1	CN	15	25.8955
CN15_2	CN	15	26.0562
CN15_2	CN	15	26.033
CN15_3	CN	15	25.8049
CN15_3	CN	15	25.948
CN15_4	CN	15	25.6263
CN15_4	CN	15	25.7398
CN15_5	CN	15	27.8785
CN15_5	CN	15	27.9674
TC0_1	TC	0	30.587
TC0_1	TC	0	30.5258
TC0_2	TC	0	29.9253
TC0_2	TC	0	30.1556
TC0_3	TC	0	31.1558
TC0_3	TC	0	31.4005
TC0_4	TC	0	30.9705
TC0_4	TC	0	30.8641
TC0_5	TC	0	29.4698
TC0_5	TC	0	29.5972
TC6_1	TC	6	27.4031
TC6_1	TC	6	27.1362
TC6_2	TC	6	29.4107
TC6_2	TC	6	29.0325
TC6_3	TC	6	28.252
TC6_3	TC	6	28.2481
TC6_4	TC	6	28.0499
TC6_4	TC	6	28.1573
TC6_5	TC	6	26.7736
TC6_5	TC	6	26.5992
TC9_1	TC	9	29.5996
TC9_1	TC	9	29.7181
TC9_2	TC	9	28.5154
TC9_2	TC	9	28.8636
TC9_3	TC	9	30.1515
TC9_3	TC	9	30.4853
TC9_4	TC	9	28.6689
TC9_4	TC	9	28.0608
TC9_5	TC	9	29.8562
TC9_5	TC	9	30.1866
TC15_1	TC	15	26.7055
TC15_1	TC	15	26.791
TC15_2	TC	15	25.9888
TC15_2	TC	15	25.9551
TC15_3	TC	15	27.4171
TC15_3	TC	15	27.6439
TC15_4	TC	15	27.9187
TC15_4	TC	15	28.105
TC15_5	TC	15	26.6441
TC15_5	TC	15	26.8153
TN6_1	TN	6	26.617
TN6_1	TN	6	26.6247
TN6_2	TN	6	27.1239
TN6_2	TN	6	27.4397
TN6_3	TN	6	26.949
TN6_3	TN	6	27.3135
TN6_4	TN	6	27.5333
TN6_4	TN	6	27.6614
TN6_5	TN	6	26.9501
TN6_5	TN	6	27.0533
TN9_1	TN	9	28.3631
TN9_1	TN	9	28.2165
TN9_2	TN	9	29.0377
TN9_2	TN	9	29.0708
TN9_3	TN	9	27.7922
TN9_3	TN	9	27.8637
TN9_4	TN	9	28.0413
TN9_4	TN	9	27.995
TN9_5	TN	9	28.491
TN9_5	TN	9	28.7067
TN15_1	TN	15	27.6548
TN15_1	TN	15	27.9297
TN15_2	TN	15	27.8232
TN15_2	TN	15	28.2895
TN15_3	TN	15	26.9703
TN15_3	TN	15	26.8243
TN15_4	TN	15	26.0067
TN15_4	TN	15	26.1332
TN15_5	TN	15	28.4596
TN15_5	TN	15	28.3617
						1:64

## Sheet: Abaecin
Sample Name	Treatment	Days	gene	CT
CC0_1	CC	0	Abaecin	28.3141
CC0_1	CC	0	Abaecin	28.3142
CC0_2	CC	0	Abaecin	27.6318
CC0_2	CC	0	Abaecin	27.775
CC0_3	CC	0	Abaecin	30.183
CC0_3	CC	0	Abaecin	30.1066
CC0_4	CC	0	Abaecin	29.869
CC0_4	CC	0	Abaecin	29.6756
CC0_5	CC	0	Abaecin	31.2098
CC0_5	CC	0	Abaecin	30.218
CC6_1	CC	6	Abaecin	31.0838
CC6_1	CC	6	Abaecin	30.8975
CC6_2	CC	6	Abaecin	27.2867
CC6_2	CC	6	Abaecin	26.9125
CC6_3	CC	6	Abaecin	31.6194
CC6_3	CC	6	Abaecin	29.7197
CC6_4	CC	6	Abaecin	30.1741
CC6_4	CC	6	Abaecin	30.4939
CC6_5	CC	6	Abaecin	27.3864
CC6_5	CC	6	Abaecin	27.4507
CC9_1	CC	9	Abaecin	30.1713
CC9_1	CC	9	Abaecin	30.1874
CC9_2	CC	9	Abaecin	33.1926
CC9_2	CC	9	Abaecin	30.2498
CC9_3	CC	9	Abaecin	30.6759
CC9_3	CC	9	Abaecin	30.1766
CC9_4	CC	9	Abaecin	28.9633
CC9_4	CC	9	Abaecin	29.4512
CC9_5	CC	9	Abaecin	31.9029
CC9_5	CC	9	Abaecin	32.2045
CC15_1	CC	15	Abaecin	26.4992
CC15_1	CC	15	Abaecin	26.9601
CC15_2	CC	15	Abaecin	29.7938
CC15_2	CC	15	Abaecin	30.2881
CC15_3	CC	15	Abaecin	27.5303
CC15_3	CC	15	Abaecin	27.5872
CC15_4	CC	15	Abaecin	26.0738
CC15_4	CC	15	Abaecin	26.3326
CC15_5	CC	15	Abaecin	26.115
CC15_5	CC	15	Abaecin	26.2815
CN6_1	CN	6	Abaecin	28.5907
CN6_1	CN	6	Abaecin	28.1097
CN6_2	CN	6	Abaecin	28.6921
CN6_2	CN	6	Abaecin	28.6328
CN6_3	CN	6	Abaecin	31.8487
CN6_3	CN	6	Abaecin	31.4397
CN6_4	CN	6	Abaecin	33.9557
CN6_4	CN	6	Abaecin	33.2681
CN6_5	CN	6	Abaecin	28.882
CN6_5	CN	6	Abaecin	28.9999
CN9_1	CN	9	Abaecin	31.7238
CN9_1	CN	9	Abaecin	31.8809
CN9_2	CN	9	Abaecin	31.6938
CN9_2	CN	9	Abaecin	31.6457
CN9_3	CN	9	Abaecin	26.9158
CN9_3	CN	9	Abaecin	26.9181
CN9_4	CN	9	Abaecin	30.2573
CN9_4	CN	9	Abaecin	30.1229
CN9_5	CN	9	Abaecin	31.7779
CN9_5	CN	9	Abaecin	31.7485
CN15_1	CN	15	Abaecin	28.1907
CN15_1	CN	15	Abaecin	28.2639
CN15_2	CN	15	Abaecin	25.9187
CN15_2	CN	15	Abaecin	26.0377
CN15_3	CN	15	Abaecin	29.8833
CN15_3	CN	15	Abaecin	30.3119
CN15_4	CN	15	Abaecin	26.6094
CN15_4	CN	15	Abaecin	26.6678
CN15_5	CN	15	Abaecin	29.0753
CN15_5	CN	15	Abaecin	29.0039
TC0_1	TC	0	Abaecin	33.5734
TC0_1	TC	0	Abaecin	33.5872
TC0_2	TC	0	Abaecin	33.4804
TC0_2	TC	0	Abaecin	32.731
TC0_3	TC	0	Abaecin	31.6061
TC0_3	TC	0	Abaecin	32.228
TC0_4	TC	0	Abaecin	33.5348
TC0_4	TC	0	Abaecin	33.212
TC0_5	TC	0	Abaecin	31.5338
TC0_5	TC	0	Abaecin	31.7132
TC6_1	TC	6	Abaecin	27.9015
TC6_1	TC	6	Abaecin	27.9605
TC6_2	TC	6	Abaecin	31.4197
TC6_2	TC	6	Abaecin	31.2191
TC6_3	TC	6	Abaecin	31.7739
TC6_3	TC	6	Abaecin	31.5144
TC6_4	TC	6	Abaecin	31.8012
TC6_4	TC	6	Abaecin	31.2779
TC6_5	TC	6	Abaecin	30.5771
TC6_5	TC	6	Abaecin	30.5579
TC9_1	TC	9	Abaecin	31.3236
TC9_1	TC	9	Abaecin	31.1628
TC9_2	TC	9	Abaecin	29.9034
TC9_2	TC	9	Abaecin	30.4493
TC9_3	TC	9	Abaecin	30.8955
TC9_3	TC	9	Abaecin	30.5502
TC9_4	TC	9	Abaecin	30.0998
TC9_4	TC	9	Abaecin	29.7737
TC9_5	TC	9	Abaecin	33.6778
TC9_5	TC	9	Abaecin	34.4431
TC15_1	TC	15	Abaecin	29.7989
TC15_1	TC	15	Abaecin	29.711
TC15_2	TC	15	Abaecin	25.5809
TC15_2	TC	15	Abaecin	25.6774
TC15_3	TC	15	Abaecin	30.5851
TC15_3	TC	15	Abaecin	30.2822
TC15_4	TC	15	Abaecin	28.428
TC15_4	TC	15	Abaecin	28.3908
TC15_5	TC	15	Abaecin	26.4542
TC15_5	TC	15	Abaecin	26.6892
TN6_1	TN	6	Abaecin	28.9009
TN6_1	TN	6	Abaecin	29.0462
TN6_2	TN	6	Abaecin	25.0734
TN6_2	TN	6	Abaecin	24.8853
TN6_3	TN	6	Abaecin	24.3912
TN6_3	TN	6	Abaecin	24.3247
TN6_4	TN	6	Abaecin	27.8246
TN6_4	TN	6	Abaecin	27.6249
TN6_5	TN	6	Abaecin	28.2413
TN6_5	TN	6	Abaecin	27.7428
TN9_1	TN	9	Abaecin	29.2849
TN9_1	TN	9	Abaecin	29.2603
TN9_2	TN	9	Abaecin	29.5034
TN9_2	TN	9	Abaecin	29.5728
TN9_3	TN	9	Abaecin	28.2357
TN9_3	TN	9	Abaecin	28.2756
TN9_4	TN	9	Abaecin	29.7594
TN9_4	TN	9	Abaecin	29.6367
TN9_5	TN	9	Abaecin	30.6253
TN9_5	TN	9	Abaecin	30.4104
TN15_1	TN	15	Abaecin	26.3312
TN15_1	TN	15	Abaecin	26.462
TN15_2	TN	15	Abaecin	28.1908
TN15_2	TN	15	Abaecin	28.4143
TN15_3	TN	15	Abaecin	26.2786
TN15_3	TN	15	Abaecin	26.7468
TN15_4	TN	15	Abaecin	26.1908
TN15_4	TN	15	Abaecin	26.4662
TN15_5	TN	15	Abaecin	27.8806
TN15_5	TN	15	Abaecin	27.9437

## Sheet: Basket
Sample Name	Treatment	Days	Target Name	CT
CC0_1	CC	0	Basket	27.5282
CC0_1	CC	0	Basket	27.455
CC0_2	CC	0	Basket	28.88
CC0_2	CC	0	Basket	29.0132
CC0_3	CC	0	Basket	30.375
CC0_3	CC	0	Basket	30.4388
CC0_4	CC	0	Basket	27.6621
CC0_4	CC	0	Basket	27.8975
CC0_5	CC	0	Basket	30.8595
CC0_5	CC	0	Basket	31.0875
CC6_1	CC	6	Basket	28.4215
CC6_1	CC	6	Basket	28.844
CC6_2	CC	6	Basket	32.3882
CC6_2	CC	6	Basket	30.4579
CC6_3	CC	6	Basket	35.9271
CC6_3	CC	6	Basket	35.8531
CC6_4	CC	6	Basket	34.4293
CC6_4	CC	6	Basket	33.9337
CC6_5	CC	6	Basket	32.5876
CC6_5	CC	6	Basket	32.1374
CC9_1	CC	9	Basket	33.2046
CC9_1	CC	9	Basket	32.6756
CC9_2	CC	9	Basket	31.6251
CC9_2	CC	9	Basket	31.89
CC9_3	CC	9	Basket	34.584
CC9_3	CC	9	Basket	35.065
CC9_4	CC	9	Basket	32.9014
CC9_4	CC	9	Basket	33.4148
CC9_5	CC	9	Basket	34.3569
CC9_5	CC	9	Basket	34.9975
CC15_1	CC	15	Basket	25.4913
CC15_1	CC	15	Basket	25.8968
CC15_2	CC	15	Basket	33.456
CC15_2	CC	15	Basket	34.0137
CC15_3	CC	15	Basket	31.5082
CC15_3	CC	15	Basket	31.9804
CC15_4	CC	15	Basket	24.3324
CC15_4	CC	15	Basket	24.1941
CC15_5	CC	15	Basket	30.8759
CC15_5	CC	15	Basket	29.783
CN6_1	CN	6	Basket	31.4173
CN6_1	CN	6	Basket	31.6472
CN6_2	CN	6	Basket	33.5803
CN6_2	CN	6	Basket	33.7638
CN6_3	CN	6	Basket	33.5556
CN6_3	CN	6	Basket	34.863
CN6_4	CN	6	Basket	35.2725
CN6_4	CN	6	Basket	34.9405
CN6_5	CN	6	Basket	32.7411
CN6_5	CN	6	Basket	33.7837
CN9_1	CN	9	Basket	35.5404
CN9_1	CN	9	Basket	33.2246
CN9_2	CN	9	Basket	35.1928
CN9_2	CN	9	Basket	34.1673
CN9_3	CN	9	Basket	28.5483
CN9_3	CN	9	Basket	28.4387
CN9_4	CN	9	Basket	30.2026
CN9_4	CN	9	Basket	30.3885
CN9_5	CN	9	Basket	36.1636
CN9_5	CN	9	Basket	35.057
CN15_1	CN	15	Basket	27.9884
CN15_1	CN	15	Basket	28.1352
CN15_2	CN	15	Basket	26.3494
CN15_2	CN	15	Basket	26.6274
CN15_3	CN	15	Basket	32.1685
CN15_3	CN	15	Basket	31.904
CN15_4	CN	15	Basket	25.9409
CN15_4	CN	15	Basket	25.8342
CN15_5	CN	15	Basket	28.3273
CN15_5	CN	15	Basket	28.5318
TC0_1	TC	0	Basket	33.6259
TC0_1	TC	0	Basket	33.8742
TC0_2	TC	0	Basket	34.6953
TC0_2	TC	0	Basket	34.1478
TC0_3	TC	0	Basket	33.1614
TC0_3	TC	0	Basket	33.1142
TC0_4	TC	0	Basket	32.6469
TC0_4	TC	0	Basket	32.8184
TC0_5	TC	0	Basket	31.8974
TC0_5	TC	0	Basket	32.6138
TC6_1	TC	6	Basket	27.227
TC6_1	TC	6	Basket	27.4016
TC6_2	TC	6	Basket	33.7472
TC6_2	TC	6	Basket	33.0081
TC6_3	TC	6	Basket	32.0532
TC6_3	TC	6	Basket	31.4974
TC6_4	TC	6	Basket	30.3687
TC6_4	TC	6	Basket	30.7268
TC6_5	TC	6	Basket	28.1632
TC6_5	TC	6	Basket	28.1704
TC9_1	TC	9	Basket	32.9877
TC9_1	TC	9	Basket	34.8146
TC9_2	TC	9	Basket	34.5985
TC9_2	TC	9	Basket	34.2402
TC9_3	TC	9	Basket	34.3564
TC9_3	TC	9	Basket	33.3982
TC9_4	TC	9	Basket	34.2833
TC9_4	TC	9	Basket	34.4422
TC9_5	TC	9	Basket	33.4306
TC9_5	TC	9	Basket	35.1163
TC15_1	TC	15	Basket	28.321
TC15_1	TC	15	Basket	28.314
TC15_2	TC	15	Basket	26.5481
TC15_2	TC	15	Basket	26.6282
TC15_3	TC	15	Basket	28.5536
TC15_3	TC	15	Basket	28.4365
TC15_4	TC	15	Basket	32.3353
TC15_4	TC	15	Basket	32.4991
TC15_5	TC	15	Basket	27.3198
TC15_5	TC	15	Basket	27.2643
TN6_1	TN	6	Basket	28.2395
TN6_1	TN	6	Basket	28.5114
TN6_2	TN	6	Basket	28.7152
TN6_2	TN	6	Basket	28.506
TN6_3	TN	6	Basket	29.5477
TN6_3	TN	6	Basket	29.6622
TN6_4	TN	6	Basket	29.4907
TN6_4	TN	6	Basket	30.0869
TN6_5	TN	6	Basket	29.7293
TN6_5	TN	6	Basket	30.1466
TN9_1	TN	9	Basket	33.3896
TN9_1	TN	9	Basket	35.1158
TN9_2	TN	9	Basket	31.6385
TN9_2	TN	9	Basket	32.3528
TN9_3	TN	9	Basket	33.6447
TN9_3	TN	9	Basket	33.7293
TN9_4	TN	9	Basket	33.6172
TN9_4	TN	9	Basket	36.2985
TN9_5	TN	9	Basket	34.6654
TN9_5	TN	9	Basket	35.8897
TN15_1	TN	15	Basket	30.769
TN15_1	TN	15	Basket	30.4495
TN15_2	TN	15	Basket	29.5243
TN15_2	TN	15	Basket	29.8512
TN15_3	TN	15	Basket	28.7679
TN15_3	TN	15	Basket	28.6804
TN15_4	TN	15	Basket	26.2358
TN15_4	TN	15	Basket	26.2149
TN15_5	TN	15	Basket	31.8801
TN15_5	TN	15	Basket	31.2202

## Sheet: Cactus
Sample Name	Treatment	Days	Target Name	CT
CC0_1	CC	0	Cactus	27.4061
CC0_1	CC	0	Cactus	27.4947
CC0_2	CC	0	Cactus	28.3834
CC0_2	CC	0	Cactus	28.2997
CC0_3	CC	0	Cactus	28.8838
CC0_3	CC	0	Cactus	28.7316
CC0_4	CC	0	Cactus	28.5515
CC0_4	CC	0	Cactus	28.8608
CC0_5	CC	0	Cactus	31.3043
CC0_5	CC	0	Cactus	31.4219
CC6_1	CC	6	Cactus	27.4774
CC6_1	CC	6	Cactus	27.4919
CC6_2	CC	6	Cactus	29.2212
CC6_2	CC	6	Cactus	29.3265
CC6_3	CC	6	Cactus	31.4736
CC6_3	CC	6	Cactus	31.8489
CC6_4	CC	6	Cactus	32.4987
CC6_4	CC	6	Cactus	32.1697
CC6_5	CC	6	Cactus	29.397
CC6_5	CC	6	Cactus	28.8164
CC9_1	CC	9	Cactus	30.0108
CC9_1	CC	9	Cactus	30.3463
CC9_2	CC	9	Cactus	29.2555
CC9_2	CC	9	Cactus	28.931
CC9_3	CC	9	Cactus	32.8172
CC9_3	CC	9	Cactus	32.7366
CC9_4	CC	9	Cactus	30.1592
CC9_4	CC	9	Cactus	30.4482
CC9_5	CC	9	Cactus	31.7184
CC9_5	CC	9	Cactus	31.8511
CC15_1	CC	15	Cactus	24.0506
CC15_1	CC	15	Cactus	24.466
CC15_2	CC	15	Cactus	30.8827
CC15_2	CC	15	Cactus	30.3605
CC15_3	CC	15	Cactus	30.3183
CC15_3	CC	15	Cactus	30.4994
CC15_4	CC	15	Cactus	23.1687
CC15_4	CC	15	Cactus	23.0324
CC15_5	CC	15	Cactus	28.052
CC15_5	CC	15	Cactus	27.9164
CN6_1	CN	6	Cactus	28.4366
CN6_1	CN	6	Cactus	28.473
CN6_2	CN	6	Cactus	30.2748
CN6_2	CN	6	Cactus	30.2738
CN6_3	CN	6	Cactus	32.2439
CN6_3	CN	6	Cactus	33.2931
CN6_4	CN	6	Cactus	32.6993
CN6_4	CN	6	Cactus	33.4705
CN6_5	CN	6	Cactus	29.7851
CN6_5	CN	6	Cactus	30.3844
CN9_1	CN	9	Cactus	32.0738
CN9_1	CN	9	Cactus	33.0559
CN9_2	CN	9	Cactus	31.774
CN9_2	CN	9	Cactus	35.8191
CN9_3	CN	9	Cactus	26.3342
CN9_3	CN	9	Cactus	26.693
CN9_4	CN	9	Cactus	28.5362
CN9_4	CN	9	Cactus	29.2995
CN9_5	CN	9	Cactus	31.1428
CN9_5	CN	9	Cactus	31.0843
CN15_1	CN	15	Cactus	26.0443
CN15_1	CN	15	Cactus	25.9172
CN15_2	CN	15	Cactus	25.5474
CN15_2	CN	15	Cactus	25.5377
CN15_3	CN	15	Cactus	29.2662
CN15_3	CN	15	Cactus	29.0008
CN15_4	CN	15	Cactus	25.029
CN15_4	CN	15	Cactus	25.3882
CN15_5	CN	15	Cactus	27.5019
CN15_5	CN	15	Cactus	27.7282
TC0_1	TC	0	Cactus	33.8394
TC0_1	TC	0	Cactus	32.9357
TC0_2	TC	0	Cactus	30.7811
TC0_2	TC	0	Cactus	32.388
TC0_3	TC	0	Cactus	32.5283
TC0_3	TC	0	Cactus	32.4483
TC0_4	TC	0	Cactus	32.3406
TC0_4	TC	0	Cactus	31.246
TC0_5	TC	0	Cactus	30.6879
TC0_5	TC	0	Cactus	29.8262
TC6_1	TC	6	Cactus	27.3337
TC6_1	TC	6	Cactus	26.7404
TC6_2	TC	6	Cactus	30.8491
TC6_2	TC	6	Cactus	32.6705
TC6_3	TC	6	Cactus	29.2486
TC6_3	TC	6	Cactus	29.4495
TC6_4	TC	6	Cactus	29.2047
TC6_4	TC	6	Cactus	29.0208
TC6_5	TC	6	Cactus	27.2962
TC6_5	TC	6	Cactus	27.2911
TC9_1	TC	9	Cactus	32.3992
TC9_1	TC	9	Cactus	31.5499
TC9_2	TC	9	Cactus	32.0769
TC9_2	TC	9	Cactus	31.702
TC9_3	TC	9	Cactus	32.2518
TC9_3	TC	9	Cactus	31.6492
TC9_4	TC	9	Cactus	31.9657
TC9_4	TC	9	Cactus	31.5951
TC9_5	TC	9	Cactus	31.6146
TC9_5	TC	9	Cactus	33.5432
TC15_1	TC	15	Cactus	26.747
TC15_1	TC	15	Cactus	27.214
TC15_2	TC	15	Cactus	25.4281
TC15_2	TC	15	Cactus	25.592
TC15_3	TC	15	Cactus	26.9496
TC15_3	TC	15	Cactus	27.1405
TC15_4	TC	15	Cactus	30.0823
TC15_4	TC	15	Cactus	30.8977
TC15_5	TC	15	Cactus	26.4583
TC15_5	TC	15	Cactus	26.7516
TN6_1	TN	6	Cactus	29.3915
TN6_1	TN	6	Cactus	29.6463
TN6_2	TN	6	Cactus	28.4954
TN6_2	TN	6	Cactus	28.2428
TN6_3	TN	6	Cactus	28.9723
TN6_3	TN	6	Cactus	29.3388
TN6_4	TN	6	Cactus	29.3058
TN6_4	TN	6	Cactus	29.7832
TN6_5	TN	6	Cactus	29.2372
TN6_5	TN	6	Cactus	29.3797
TN9_1	TN	9	Cactus	30.4081
TN9_1	TN	9	Cactus	30.848
TN9_2	TN	9	Cactus	29.8829
TN9_2	TN	9	Cactus	29.7616
TN9_3	TN	9	Cactus	30.0183
TN9_3	TN	9	Cactus	30.277
TN9_4	TN	9	Cactus	31.8826
TN9_4	TN	9	Cactus	32.9216
TN9_5	TN	9	Cactus	31.7999
TN9_5	TN	9	Cactus	31.8256
TN15_1	TN	15	Cactus	28.6015
TN15_1	TN	15	Cactus	28.5569
TN15_2	TN	15	Cactus	27.9952
TN15_2	TN	15	Cactus	28.0206
TN15_3	TN	15	Cactus	27.5996
TN15_3	TN	15	Cactus	27.6602
TN15_4	TN	15	Cactus	26.1369
TN15_4	TN	15	Cactus	26.2755
TN15_5	TN	15	Cactus	29.8019
TN15_5	TN	15	Cactus	30.15

## Sheet: Defensin1
Sample Name	Treatment	Days	Target Name	Ct
CC0_1	CC	0	Defensin1	25.6576
CC0_1	CC	0	Defensin1	25.7613
CC0_2	CC	0	Defensin1	25.3638
CC0_2	CC	0	Defensin1	25.3989
CC0_3	CC	0	Defensin1	26.7204
CC0_3	CC	0	Defensin1	26.7998
CC0_4	CC	0	Defensin1	29.696
CC0_4	CC	0	Defensin1	29.8937
CC0_5	CC	0	Defensin1	29.6308
CC0_5	CC	0	Defensin1	29.2886
CC6_1	CC	6	Defensin1	27.9892
CC6_1	CC	6	Defensin1	28.3357
CC6_2	CC	6	Defensin1	27.1527
CC6_2	CC	6	Defensin1	26.8299
CC6_3	CC	6	Defensin1	27.7894
CC6_3	CC	6	Defensin1	27.7767
CC6_4	CC	6	Defensin1	29.088
CC6_4	CC	6	Defensin1	29.5561
CC6_5	CC	6	Defensin1	30.1017
CC6_5	CC	6	Defensin1	30.4819
CC9_1	CC	9	Defensin1	30.5053
CC9_1	CC	9	Defensin1	30.4557
CC9_2	CC	9	Defensin1	33.0581
CC9_2	CC	9	Defensin1	33.3246
CC9_3	CC	9	Defensin1	32.0608
CC9_3	CC	9	Defensin1	32.432
CC9_4	CC	9	Defensin1	Undetermined
CC9_4	CC	9	Defensin1	34.2508
CC9_5	CC	9	Defensin1	Undetermined
CC9_5	CC	9	Defensin1	34.3346
CC15_1	CC	15	Defensin1	33.1219
CC15_1	CC	15	Defensin1	34.4639
CC15_2	CC	15	Defensin1	Undetermined
CC15_2	CC	15	Defensin1	35.5046
CC15_3	CC	15	Defensin1	34.276
CC15_3	CC	15	Defensin1	36.307
CC15_4	CC	15	Defensin1	35.5747
CC15_4	CC	15	Defensin1	33.5101
CC15_5	CC	15	Defensin1	36.6608
CC15_5	CC	15	Defensin1	Undetermined
CN6_1	CN	6	Defensin1	31.3052
CN6_1	CN	6	Defensin1	31.2203
CN6_2	CN	6	Defensin1	29.3871
CN6_2	CN	6	Defensin1	29.4609
CN6_3	CN	6	Defensin1	31.0767
CN6_3	CN	6	Defensin1	31.7859
CN6_4	CN	6	Defensin1	30.0938
CN6_4	CN	6	Defensin1	30.5029
CN6_5	CN	6	Defensin1	29.3048
CN6_5	CN	6	Defensin1	29.4937
CN9_1	CN	9	Defensin1	35.3735
CN9_1	CN	9	Defensin1	33.2651
CN9_2	CN	9	Defensin1	33.7786
CN9_2	CN	9	Defensin1	35.3761
CN9_3	CN	9	Defensin1	32.6182
CN9_3	CN	9	Defensin1	34.4524
CN9_4	CN	9	Defensin1	33.4529
CN9_4	CN	9	Defensin1	33.777
CN9_5	CN	9	Defensin1	34.3365
CN9_5	CN	9	Defensin1	34.4187
CN15_1	CN	15	Defensin1	Undetermined
CN15_1	CN	15	Defensin1	35.4196
CN15_2	CN	15	Defensin1	35.3322
CN15_2	CN	15	Defensin1	34.9519
CN15_3	CN	15	Defensin1	Undetermined
CN15_3	CN	15	Defensin1	34.4192
CN15_4	CN	15	Defensin1	Undetermined
CN15_4	CN	15	Defensin1	Undetermined
CN15_5	CN	15	Defensin1	Undetermined
CN15_5	CN	15	Defensin1	Undetermined
TC0_1	TC	0	Defensin1	28.8417
TC0_1	TC	0	Defensin1	28.3814
TC0_2	TC	0	Defensin1	27.0965
TC0_2	TC	0	Defensin1	27.2958
TC0_3	TC	0	Defensin1	33.7326
TC0_3	TC	0	Defensin1	31.7639
TC0_4	TC	0	Defensin1	30.2652
TC0_4	TC	0	Defensin1	30.49
TC0_5	TC	0	Defensin1	31.2234
TC0_5	TC	0	Defensin1	30.9917
TC6_1	TC	6	Defensin1	28.6403
TC6_1	TC	6	Defensin1	28.5505
TC6_2	TC	6	Defensin1	30.0151
TC6_2	TC	6	Defensin1	30.1883
TC6_3	TC	6	Defensin1	30.6766
TC6_3	TC	6	Defensin1	30.9626
TC6_4	TC	6	Defensin1	28.23
TC6_4	TC	6	Defensin1	28.1836
TC6_5	TC	6	Defensin1	27.4714
TC6_5	TC	6	Defensin1	27.1048
TC9_1	TC	9	Defensin1	32.5351
TC9_1	TC	9	Defensin1	31.3175
TC9_2	TC	9	Defensin1	35.1749
TC9_2	TC	9	Defensin1	34.8234
TC9_3	TC	9	Defensin1	32.3383
TC9_3	TC	9	Defensin1	32.1578
TC9_4	TC	9	Defensin1	34.0228
TC9_4	TC	9	Defensin1	35.5206
TC9_5	TC	9	Defensin1	Undetermined
TC9_5	TC	9	Defensin1	Undetermined
TC15_1	TC	15	Defensin1	35.6733
TC15_1	TC	15	Defensin1	Undetermined
TC15_2	TC	15	Defensin1	Undetermined
TC15_2	TC	15	Defensin1	35.6954
TC15_3	TC	15	Defensin1	35.4057
TC15_3	TC	15	Defensin1	Undetermined
TC15_4	TC	15	Defensin1	Undetermined
TC15_4	TC	15	Defensin1	Undetermined
TC15_5	TC	15	Defensin1	Undetermined
TC15_5	TC	15	Defensin1	Undetermined
TN6_1	TN	6	Defensin1	28.1238
TN6_1	TN	6	Defensin1	28.0614
TN6_2	TN	6	Defensin1	24.075
TN6_2	TN	6	Defensin1	24.2085
TN6_3	TN	6	Defensin1	23.74
TN6_3	TN	6	Defensin1	23.9906
TN6_4	TN	6	Defensin1	25.9028
TN6_4	TN	6	Defensin1	26.0639
TN6_5	TN	6	Defensin1	25.0148
TN6_5	TN	6	Defensin1	25.1121
TN9_1	TN	9	Defensin1	33.6306
TN9_1	TN	9	Defensin1	Undetermined
TN9_2	TN	9	Defensin1	Undetermined
TN9_2	TN	9	Defensin1	Undetermined
TN9_3	TN	9	Defensin1	Undetermined
TN9_3	TN	9	Defensin1	Undetermined
TN9_4	TN	9	Defensin1	32.9084
TN9_4	TN	9	Defensin1	32.9349
TN9_5	TN	9	Defensin1	35.2488
TN9_5	TN	9	Defensin1	Undetermined
TN15_1	TN	15	Defensin1	35.4055
TN15_1	TN	15	Defensin1	Undetermined
TN15_2	TN	15	Defensin1	36.4973
TN15_2	TN	15	Defensin1	Undetermined
TN15_3	TN	15	Defensin1	Undetermined
TN15_3	TN	15	Defensin1	Undetermined
TN15_4	TN	15	Defensin1	Undetermined
TN15_4	TN	15	Defensin1	Undetermined
TN15_5	TN	15	Defensin1	Undetermined
TN15_5	TN	15	Defensin1	Undetermined

## Sheet: Defensin2
Sample Name	Treatment	Days	Target Name	CT
CC0_1	CC	0	Defensin2	29.2532
CC0_1	CC	0	Defensin2	28.9111
CC0_2	CC	0	Defensin2	32.8955
CC0_2	CC	0	Defensin2	31.6089
CC0_3	CC	0	Defensin2	30.656
CC0_3	CC	0	Defensin2	30.4297
CC0_4	CC	0	Defensin2	31.393
CC0_4	CC	0	Defensin2	31.2072
CC0_5	CC	0	Defensin2	32.2703
CC0_5	CC	0	Defensin2	33.1715
CC6_1	CC	6	Defensin2	27.4613
CC6_1	CC	6	Defensin2	27.3622
CC6_2	CC	6	Defensin2	28.8495
CC6_2	CC	6	Defensin2	28.4447
CC6_3	CC	6	Defensin2	30.4457
CC6_3	CC	6	Defensin2	29.925
CC6_4	CC	6	Defensin2	30.5896
CC6_4	CC	6	Defensin2	31.5689
CC6_5	CC	6	Defensin2	27.938
CC6_5	CC	6	Defensin2	27.824
CC9_1	CC	9	Defensin2	29.1701
CC9_1	CC	9	Defensin2	29.1057
CC9_2	CC	9	Defensin2	29.0133
CC9_2	CC	9	Defensin2	28.8833
CC9_3	CC	9	Defensin2	30.4671
CC9_3	CC	9	Defensin2	30.2937
CC9_4	CC	9	Defensin2	28.0875
CC9_4	CC	9	Defensin2	28.3035
CC9_5	CC	9	Defensin2	30.5973
CC9_5	CC	9	Defensin2	30.4214
CC15_1	CC	15	Defensin2	23.039
CC15_1	CC	15	Defensin2	22.9618
CC15_2	CC	15	Defensin2	28.252
CC15_2	CC	15	Defensin2	28.2181
CC15_3	CC	15	Defensin2	28.4487
CC15_3	CC	15	Defensin2	28.715
CC15_4	CC	15	Defensin2	22.3264
CC15_4	CC	15	Defensin2	22.2589
CC15_5	CC	15	Defensin2	26.6002
CC15_5	CC	15	Defensin2	26.464
CN6_1	CN	6	Defensin2	27.2561
CN6_1	CN	6	Defensin2	27.5137
CN6_2	CN	6	Defensin2	28.7688
CN6_2	CN	6	Defensin2	28.5168
CN6_3	CN	6	Defensin2	29.9643
CN6_3	CN	6	Defensin2	29.9868
CN6_4	CN	6	Defensin2	29.115
CN6_4	CN	6	Defensin2	29.2855
CN6_5	CN	6	Defensin2	27.5031
CN6_5	CN	6	Defensin2	27.8729
CN9_1	CN	9	Defensin2	31.1159
CN9_1	CN	9	Defensin2	31.6238
CN9_2	CN	9	Defensin2	30.3648
CN9_2	CN	9	Defensin2	30.6633
CN9_3	CN	9	Defensin2	26.4951
CN9_3	CN	9	Defensin2	26.2681
CN9_4	CN	9	Defensin2	28.5258
CN9_4	CN	9	Defensin2	28.5748
CN9_5	CN	9	Defensin2	27.465
CN9_5	CN	9	Defensin2	27.5937
CN15_1	CN	15	Defensin2	24.8398
CN15_1	CN	15	Defensin2	24.863
CN15_2	CN	15	Defensin2	24.7126
CN15_2	CN	15	Defensin2	24.7612
CN15_3	CN	15	Defensin2	26.5734
CN15_3	CN	15	Defensin2	26.3584
CN15_4	CN	15	Defensin2	24.7282
CN15_4	CN	15	Defensin2	24.6895
CN15_5	CN	15	Defensin2	27.0346
CN15_5	CN	15	Defensin2	26.847
TC0_1	TC	0
TC0_1	TC	0	Defensin2	32.4159
TC0_2	TC	0	Defensin2	32.3789
TC0_2	TC	0	Defensin2	32.8126
TC0_3	TC	0	Defensin2	31.809
TC0_3	TC	0	Defensin2	32.2473
TC0_4	TC	0	Defensin2	32.4315
TC0_4	TC	0	Defensin2	31.7028
TC0_5	TC	0	Defensin2	30.8892
TC0_5	TC	0	Defensin2	30.8909
TC6_1	TC	6	Defensin2	26.6772
TC6_1	TC	6	Defensin2	26.7675
TC6_2	TC	6	Defensin2	29.8227
TC6_2	TC	6	Defensin2	29.5049
TC6_3	TC	6	Defensin2	29.0029
TC6_3	TC	6	Defensin2	28.3601
TC6_4	TC	6	Defensin2	27.9344
TC6_4	TC	6	Defensin2	27.7989
TC6_5	TC	6	Defensin2	26.4048
TC6_5	TC	6	Defensin2	26.3803
TC9_1	TC	9	Defensin2	29.1128
TC9_1	TC	9	Defensin2	29.3233
TC9_2	TC	9	Defensin2	28.2652
TC9_2	TC	9	Defensin2	28.2768
TC9_3	TC	9	Defensin2	30.7457
TC9_3	TC	9	Defensin2	30.3585
TC9_4	TC	9	Defensin2	27.3602
TC9_4	TC	9	Defensin2	27.4949
TC9_5	TC	9	Defensin2	29.17
TC9_5	TC	9	Defensin2	29.4652
TC15_1	TC	15	Defensin2	25.7128
TC15_1	TC	15	Defensin2	25.9735
TC15_2	TC	15	Defensin2	24.9213
TC15_2	TC	15	Defensin2	24.8847
TC15_3	TC	15	Defensin2	26.5697
TC15_3	TC	15	Defensin2	26.9409
TC15_4	TC	15	Defensin2	28.6439
TC15_4	TC	15	Defensin2	28.2958
TC15_5	TC	15	Defensin2	25.7294
TC15_5	TC	15	Defensin2	25.7397
TN6_1	TN	6	Defensin2	29.7364
TN6_1	TN	6	Defensin2	29.6398
TN6_2	TN	6	Defensin2	28.3182
TN6_2	TN	6	Defensin2	28.3476
TN6_3	TN	6	Defensin2	28.8409
TN6_3	TN	6	Defensin2	29.2542
TN6_4	TN	6	Defensin2	29.6914
TN6_4	TN	6	Defensin2	29.7065
TN6_5	TN	6	Defensin2	31.5751
TN6_5	TN	6	Defensin2	30.5721
TN9_1	TN	9	Defensin2	28.5738
TN9_1	TN	9	Defensin2	29.2034
TN9_2	TN	9	Defensin2	28.554
TN9_2	TN	9	Defensin2	28.8015
TN9_3	TN	9	Defensin2	27.8764
TN9_3	TN	9	Defensin2	27.6796
TN9_4	TN	9	Defensin2	28.0404
TN9_4	TN	9	Defensin2	28.3031
TN9_5	TN	9	Defensin2	28.6947
TN9_5	TN	9	Defensin2	28.5064
TN15_1	TN	15	Defensin2	26.8286
TN15_1	TN	15	Defensin2	27.0331
TN15_2	TN	15	Defensin2	26.4829
TN15_2	TN	15	Defensin2	26.5065
TN15_3	TN	15	Defensin2	25.9199
TN15_3	TN	15	Defensin2	25.957
TN15_4	TN	15	Defensin2	25.057
TN15_4	TN	15	Defensin2	25.0444
TN15_5	TN	15	Defensin2	27.8475
TN15_5	TN	15	Defensin2	27.8268

## Sheet: Domeless
Sample Name	Treatment	Days		Ct
CC0_1	CC	0	Domeless	30.6436
CC0_1	CC	0	Domeless	30.6237
CC0_2	CC	0	Domeless	31.7961
CC0_2	CC	0	Domeless	31.259
CC0_3	CC	0	Domeless	31.244
CC0_3	CC	0	Domeless	31.3372
CC0_4	CC	0	Domeless	30.6325
CC0_4	CC	0	Domeless	30.2508
CC0_5	CC	0	Domeless	31.8621
CC0_5	CC	0	Domeless	31.6578
CC6_1	CC	6	Domeless	26.802
CC6_1	CC	6	Domeless	26.8922
CC6_2	CC	6	Domeless	27.1204
CC6_2	CC	6	Domeless	27.0362
CC6_3	CC	6	Domeless	27.12
CC6_3	CC	6	Domeless	27.2022
CC6_4	CC	6	Domeless	27.2865
CC6_4	CC	6	Domeless	27.3887
CC6_5	CC	6	Domeless	27.6136
CC6_5	CC	6	Domeless	27.869
CC9_1	CC	9	Domeless	27.8457
CC9_1	CC	9	Domeless	28.6487
CC9_2	CC	9	Domeless	28.5487
CC9_2	CC	9	Domeless	28.3992
CC9_3	CC	9	Domeless	29.6159
CC9_3	CC	9	Domeless	29.4514
CC9_4	CC	9	Domeless	27.37
CC9_4	CC	9	Domeless	27.4587
CC9_5	CC	9	Domeless	29.8643
CC9_5	CC	9	Domeless	29.7209
CC15_1	CC	15	Domeless	25.258
CC15_1	CC	15	Domeless	25.4921
CC15_2	CC	15	Domeless	30.7998
CC15_2	CC	15	Domeless	31.2297
CC15_3	CC	15	Domeless	30.1312
CC15_3	CC	15	Domeless	30.2258
CC15_4	CC	15	Domeless	24.4187
CC15_4	CC	15	Domeless	24.7106
CC15_5	CC	15	Domeless	29.469
CC15_5	CC	15	Domeless	29.6461
CN6_1	CN	6	Domeless	27.126
CN6_1	CN	6	Domeless	27.1708
CN6_2	CN	6	Domeless	27.7677
CN6_2	CN	6	Domeless	28.0802
CN6_3	CN	6	Domeless	27.337
CN6_3	CN	6	Domeless	27.3805
CN6_4	CN	6	Domeless	27.3714
CN6_4	CN	6	Domeless	27.5115
CN6_5	CN	6	Domeless	26.5599
CN6_5	CN	6	Domeless	26.5643
CN9_1	CN	9	Domeless	30.5155
CN9_1	CN	9	Domeless	30.3287
CN9_2	CN	9	Domeless	29.4471
CN9_2	CN	9	Domeless	29.7304
CN9_3	CN	9	Domeless	26.9906
CN9_3	CN	9	Domeless	27.2961
CN9_4	CN	9	Domeless	29.512
CN9_4	CN	9	Domeless	30.0871
CN9_5	CN	9	Domeless	27.5656
CN9_5	CN	9	Domeless	27.4415
CN15_1	CN	15	Domeless	27.3691
CN15_1	CN	15	Domeless	27.4895
CN15_2	CN	15	Domeless	27.4317
CN15_2	CN	15	Domeless	27.1598
CN15_3	CN	15	Domeless	25.3024
CN15_3	CN	15	Domeless	25.3653
CN15_4	CN	15	Domeless	26.0693
CN15_4	CN	15	Domeless	25.9465
CN15_5	CN	15	Domeless	28.2088
CN15_5	CN	15	Domeless	28.0738
TC0_1	TC	0	Domeless	30.6476
TC0_1	TC	0	Domeless	30.5262
TC0_2	TC	0	Domeless	30.7482
TC0_2	TC	0	Domeless	30.792
TC0_3	TC	0	Domeless	30.2894
TC0_3	TC	0	Domeless	30.6344
TC0_4	TC	0	Domeless	30.7773
TC0_4	TC	0	Domeless	30.4607
TC0_5	TC	0	Domeless	32.363
TC0_5	TC	0	Domeless	31.7395
TC6_1	TC	6	Domeless	28.2047
TC6_1	TC	6	Domeless	27.9709
TC6_2	TC	6	Domeless	26.9969
TC6_2	TC	6	Domeless	27.1787
TC6_3	TC	6	Domeless	27.3389
TC6_3	TC	6	Domeless	27.2427
TC6_4	TC	6	Domeless	27.6426
TC6_4	TC	6	Domeless	27.6233
TC6_5	TC	6	Domeless	26.6998
TC6_5	TC	6	Domeless	26.563
TC9_1	TC	9	Domeless	29.2767
TC9_1	TC	9	Domeless	28.9483
TC9_2	TC	9	Domeless	28.2167
TC9_2	TC	9	Domeless	28.0814
TC9_3	TC	9	Domeless	30.7576
TC9_3	TC	9	Domeless	30.4769
TC9_4	TC	9	Domeless	27.0246
TC9_4	TC	9	Domeless	27.3981
TC9_5	TC	9	Domeless	28.1406
TC9_5	TC	9	Domeless	28.38
TC15_1	TC	15	Domeless	28.547
TC15_1	TC	15	Domeless	28.2186
TC15_2	TC	15	Domeless	26.5432
TC15_2	TC	15	Domeless	26.3662
TC15_3	TC	15	Domeless	29.0532
TC15_3	TC	15	Domeless	28.6452
TC15_4	TC	15	Domeless	27.4462
TC15_4	TC	15	Domeless	27.5815
TC15_5	TC	15	Domeless	27.7281
TC15_5	TC	15	Domeless	27.5254
TN6_1	TN	6	Domeless	28.734
TN6_1	TN	6	Domeless	29.1192
TN6_2	TN	6	Domeless	29.538
TN6_2	TN	6	Domeless	29.535
TN6_3	TN	6	Domeless	28.6569
TN6_3	TN	6	Domeless	28.8694
TN6_4	TN	6	Domeless	28.8298
TN6_4	TN	6	Domeless	29.0454
TN6_5	TN	6	Domeless	29.5368
TN6_5	TN	6	Domeless	29.8855
TN9_1	TN	9	Domeless	27.4792
TN9_1	TN	9	Domeless	27.7835
TN9_2	TN	9	Domeless	28.3671
TN9_2	TN	9	Domeless	28.8035
TN9_3	TN	9	Domeless	27.7814
TN9_3	TN	9	Domeless	27.6798
TN9_4	TN	9	Domeless	27.1931
TN9_4	TN	9	Domeless	27.3933
TN9_5	TN	9	Domeless	28.6908
TN9_5	TN	9	Domeless	28.9982
TN15_1	TN	15	Domeless	28.2911
TN15_1	TN	15	Domeless	28.2578
TN15_2	TN	15	Domeless	29.3379
TN15_2	TN	15	Domeless	29.4142
TN15_3	TN	15	Domeless	27.7763
TN15_3	TN	15	Domeless	27.6285
TN15_4	TN	15	Domeless	26.7006
TN15_4	TN	15	Domeless	26.9409
TN15_5	TN	15	Domeless	29.4209
TN15_5	TN	15	Domeless	29.0627

## Sheet: Dorsal1
Sample Name	Treatment	Days		Ct
CC0_1	CC	0	Dorsal	27.4625
CC0_1	CC	0	Dorsal	26.9342
CC0_2	CC	0	Dorsal	28.1241
CC0_2	CC	0	Dorsal	28.3597
CC0_3	CC	0	Dorsal	28.8088
CC0_3	CC	0	Dorsal	28.6544
CC0_4	CC	0	Dorsal	28.0935
CC0_4	CC	0	Dorsal	27.7487
CC0_5	CC	0	Dorsal	29.6727
CC0_5	CC	0	Dorsal	30.2194
CC6_1	CC	6	Dorsal	26.3797
CC6_1	CC	6	Dorsal	26.1387
CC6_2	CC	6	Dorsal	27.7339
CC6_2	CC	6	Dorsal	26.8466
CC6_3	CC	6	Dorsal	27.888
CC6_3	CC	6	Dorsal	27.6382
CC6_4	CC	6	Dorsal	28.1824
CC6_4	CC	6	Dorsal	27.6071
CC6_5	CC	6	Dorsal	27.0685
CC6_5	CC	6	Dorsal	27.5207
CC9_1	CC	9	Dorsal	27.0932
CC9_1	CC	9	Dorsal	26.9896
CC9_2	CC	9	Dorsal	27.7232
CC9_2	CC	9	Dorsal	27.3063
CC9_3	CC	9	Dorsal	28.2554
CC9_3	CC	9	Dorsal	28.8467
CC9_4	CC	9	Dorsal	35.2948
CC9_4	CC	9	Dorsal	26.5719
CC9_5	CC	9	Dorsal	29.0671
CC9_5	CC	9	Dorsal	28.5404
CC15_1	CC	15	Dorsal	22.0367
CC15_1	CC	15	Dorsal	22.9816
CC15_2	CC	15	Dorsal	26.5489
CC15_2	CC	15	Dorsal	26.653
CC15_3	CC	15	Dorsal	27.9966
CC15_3	CC	15	Dorsal	27.1198
CC15_4	CC	15	Dorsal	22.0463
CC15_4	CC	15	Dorsal	21.8282
CC15_5	CC	15	Dorsal	25.3577
CC15_5	CC	15	Dorsal	25.7642
CN6_1	CN	6	Dorsal	26.4466
CN6_1	CN	6	Dorsal	26.588
CN6_2	CN	6	Dorsal	27.9215
CN6_2	CN	6	Dorsal	27.37
CN6_3	CN	6	Dorsal	27.6186
CN6_3	CN	6	Dorsal	27.269
CN6_4	CN	6	Dorsal	27.3304
CN6_4	CN	6	Dorsal	27.0849
CN6_5	CN	6	Dorsal	26.8422
CN6_5	CN	6	Dorsal	25.8757
CN9_1	CN	9	Dorsal	29.9014
CN9_1	CN	9	Dorsal	30.1368
CN9_2	CN	9	Dorsal	28.8363
CN9_2	CN	9	Dorsal	28.6982
CN9_3	CN	9	Dorsal	25.528
CN9_3	CN	9	Dorsal	25.4122
CN9_4	CN	9	Dorsal	27.7055
CN9_4	CN	9	Dorsal	27.929
CN9_5	CN	9	Dorsal	25.9693
CN9_5	CN	9	Dorsal	25.743
CN15_1	CN	15	Dorsal	23.9143
CN15_1	CN	15	Dorsal	23.9548
CN15_2	CN	15	Dorsal	24.7609
CN15_2	CN	15	Dorsal	24.442
CN15_3	CN	15	Dorsal	24.2194
CN15_3	CN	15	Dorsal	24.3534
CN15_4	CN	15	Dorsal	23.7926
CN15_4	CN	15	Dorsal	23.8613
CN15_5	CN	15	Dorsal	26.1987
CN15_5	CN	15	Dorsal	26.5031
TC0_1	TC	0	Dorsal	31.8738
TC0_1	TC	0	Dorsal	32.0876
TC0_2	TC	0	Dorsal	31.361
TC0_2	TC	0	Dorsal	31.1855
TC0_3	TC	0	Dorsal	31.4654
TC0_3	TC	0	Dorsal	30.85
TC0_4	TC	0	Dorsal	30.4277
TC0_4	TC	0	Dorsal	30.731
TC0_5	TC	0	Dorsal	29.2973
TC0_5	TC	0	Dorsal	Undetermined
TC6_1	TC	6	Dorsal	26.1822
TC6_1	TC	6	Dorsal	25.9779
TC6_2	TC	6	Dorsal	28.8214
TC6_2	TC	6	Dorsal	28.4965
TC6_3	TC	6	Dorsal	27.1911
TC6_3	TC	6	Dorsal	27.378
TC6_4	TC	6	Dorsal	27.0413
TC6_4	TC	6	Dorsal	26.6649
TC6_5	TC	6	Dorsal	25.6031
TC6_5	TC	6	Dorsal	25.3935
TC9_1	TC	9	Dorsal	27.4906
TC9_1	TC	9	Dorsal	26.7674
TC9_2	TC	9	Dorsal	27.4326
TC9_2	TC	9	Dorsal	26.8437
TC9_3	TC	9	Dorsal	29.1752
TC9_3	TC	9	Dorsal	28.7198
TC9_4	TC	9	Dorsal	26.3132
TC9_4	TC	9	Dorsal	25.5144
TC9_5	TC	9	Dorsal	27.4528
TC9_5	TC	9	Dorsal	26.7813
TC15_1	TC	15	Dorsal	24.8621
TC15_1	TC	15	Dorsal	25.0859
TC15_2	TC	15	Dorsal	24.2032
TC15_2	TC	15	Dorsal	24.4667
TC15_3	TC	15	Dorsal	25.7461
TC15_3	TC	15	Dorsal	25.7932
TC15_4	TC	15	Dorsal	26.3455
TC15_4	TC	15	Dorsal	26.4615
TC15_5	TC	15	Dorsal	24.6258
TC15_5	TC	15	Dorsal	24.6646
TN6_1	TN	6	Dorsal	27.6716
TN6_1	TN	6	Dorsal	Undetermined
TN6_2	TN	6	Dorsal	27.2023
TN6_2	TN	6	Dorsal	27.5178
TN6_3	TN	6	Dorsal	27.782
TN6_3	TN	6	Dorsal	27.4082
TN6_4	TN	6	Dorsal	28.3182
TN6_4	TN	6	Dorsal	27.6971
TN6_5	TN	6	Dorsal	28.6327
TN6_5	TN	6	Dorsal	27.7994
TN9_1	TN	9	Dorsal	26.4454
TN9_1	TN	9	Dorsal	26.6233
TN9_2	TN	9	Dorsal	27.6463
TN9_2	TN	9	Dorsal	26.9766
TN9_3	TN	9	Dorsal	26.4758
TN9_3	TN	9	Dorsal	26.1724
TN9_4	TN	9	Dorsal	26.0191
TN9_4	TN	9	Dorsal	26.3022
TN9_5	TN	9	Dorsal	27.1482
TN9_5	TN	9	Dorsal	26.9372
TN15_1	TN	15	Dorsal	25.0842
TN15_1	TN	15	Dorsal	25.1888
TN15_2	TN	15	Dorsal	25.2807
TN15_2	TN	15	Dorsal	25.3556
TN15_3	TN	15	Dorsal	24.8271
TN15_3	TN	15	Dorsal	25.7998
TN15_4	TN	15	Dorsal	24.2672
TN15_4	TN	15	Dorsal	24.4482
TN15_5	TN	15	Dorsal	25.8744
TN15_5	TN	15	Dorsal	25.9869

## Sheet: Kayak
Sample Name	Treatment	Days
CC0_1	CC	0	Kayak	25.6952
CC0_1	CC	0	Kayak	25.6827
CC0_2	CC	0	Kayak	27.2563
CC0_2	CC	0	Kayak	27.2906
CC0_3	CC	0	Kayak	Undetermined
CC0_3	CC	0	Kayak	28.0097
CC0_4	CC	0	Kayak	26.3864
CC0_4	CC	0	Kayak	26.4146
CC0_5	CC	0	Kayak	28.4967
CC0_5	CC	0	Kayak	28.6798
CC6_1	CC	6	Kayak	28.189
CC6_1	CC	6	Kayak	27.7716
CC6_2	CC	6	Kayak	30.0052
CC6_2	CC	6	Kayak	29.6713
CC6_3	CC	6	Kayak	32.114
CC6_3	CC	6	Kayak	31.2909
CC6_4	CC	6	Kayak	30.9471
CC6_4	CC	6	Kayak	31.9727
CC6_5	CC	6	Kayak	Undetermined
CC6_5	CC	6	Kayak	28.3001
CC9_1	CC	9	Kayak	34.0484
CC9_1	CC	9	Kayak	35.7464
CC9_2	CC	9	Kayak	32.2535
CC9_2	CC	9	Kayak	Undetermined
CC9_3	CC	9	Kayak	Undetermined
CC9_3	CC	9	Kayak	33.4097
CC9_4	CC	9	Kayak	32.39
CC9_4	CC	9	Kayak	32.5626
CC9_5	CC	9	Kayak	34.5417
CC9_5	CC	9	Kayak	34.736
CC15_1	CC	15	Kayak	Undetermined
CC15_1	CC	15	Kayak	Undetermined
CC15_2	CC	15	Kayak	Undetermined
CC15_2	CC	15	Kayak	Undetermined
CC15_3	CC	15	Kayak	Undetermined
CC15_3	CC	15	Kayak	Undetermined
CC15_4	CC	15	Kayak	Undetermined
CC15_4	CC	15	Kayak	38.9056
CC15_5	CC	15	Kayak	Undetermined
CC15_5	CC	15	Kayak	Undetermined
CN6_1	CN	6	Kayak	34.6853
CN6_1	CN	6	Kayak	31.5149
CN6_2	CN	6	Kayak	31.2251
CN6_2	CN	6	Kayak	31.1432
CN6_3	CN	6	Kayak	32.3361
CN6_3	CN	6	Kayak	31.1845
CN6_4	CN	6	Kayak	31.7262
CN6_4	CN	6	Kayak	32.1148
CN6_5	CN	6	Kayak	32.571
CN6_5	CN	6	Kayak	33.3017
CN9_1	CN	9	Kayak	Undetermined
CN9_1	CN	9	Kayak	34.7527
CN9_2	CN	9	Kayak	Undetermined
CN9_2	CN	9	Kayak	Undetermined
CN9_3	CN	9	Kayak	Undetermined
CN9_3	CN	9	Kayak	Undetermined
CN9_4	CN	9	Kayak	34.3931
CN9_4	CN	9	Kayak	Undetermined
CN9_5	CN	9	Kayak	Undetermined
CN9_5	CN	9	Kayak	Undetermined
CN15_1	CN	15	Kayak	Undetermined
CN15_1	CN	15	Kayak	Undetermined
CN15_2	CN	15	Kayak	38.542
CN15_2	CN	15	Kayak	Undetermined
CN15_3	CN	15	Kayak	Undetermined
CN15_3	CN	15	Kayak	Undetermined
CN15_4	CN	15	Kayak	Undetermined
CN15_4	CN	15	Kayak	Undetermined
CN15_5	CN	15	Kayak	Undetermined
CN15_5	CN	15	Kayak	Undetermined
TC0_1	TC	0	Kayak	31.0717
TC0_1	TC	0	Kayak	31.2101
TC0_2	TC	0	Kayak	30.5282
TC0_2	TC	0	Kayak	29.9931
TC0_3	TC	0	Kayak	31.155
TC0_3	TC	0	Kayak	33.3673
TC0_4	TC	0	Kayak	30.8368
TC0_4	TC	0	Kayak	30.6952
TC0_5	TC	0	Kayak	29.7864
TC0_5	TC	0	Kayak	29.2264
TC6_1	TC	6	Kayak	31.0929
TC6_1	TC	6	Kayak	29.6062
TC6_2	TC	6	Kayak	31.367
TC6_2	TC	6	Kayak	31.6499
TC6_3	TC	6	Kayak	31.1761
TC6_3	TC	6	Kayak	29.9853
TC6_4	TC	6	Kayak	30.5323
TC6_4	TC	6	Kayak	31.1753
TC6_5	TC	6	Kayak	29.7783
TC6_5	TC	6	Kayak	29.9708
TC9_1	TC	9	Kayak	34.6075
TC9_1	TC	9	Kayak	Undetermined
TC9_2	TC	9	Kayak	Undetermined
TC9_2	TC	9	Kayak	Undetermined
TC9_3	TC	9	Kayak	33.6449
TC9_3	TC	9	Kayak	34.547
TC9_4	TC	9	Kayak	33.3719
TC9_4	TC	9	Kayak	Undetermined
TC9_5	TC	9	Kayak	33.2723
TC9_5	TC	9	Kayak	34.6535
TC15_1	TC	15	Kayak	Undetermined
TC15_1	TC	15	Kayak	Undetermined
TC15_2	TC	15	Kayak	Undetermined
TC15_2	TC	15	Kayak	Undetermined
TC15_3	TC	15	Kayak	Undetermined
TC15_3	TC	15	Kayak	Undetermined
TC15_4	TC	15	Kayak	Undetermined
TC15_4	TC	15	Kayak	Undetermined
TC15_5	TC	15	Kayak	Undetermined
TC15_5	TC	15	Kayak	Undetermined
TN6_1	TN	6	Kayak	25.9949
TN6_1	TN	6	Kayak	25.916
TN6_2	TN	6	Kayak	25.7971
TN6_2	TN	6	Kayak	25.979
TN6_3	TN	6	Kayak	27.1252
TN6_3	TN	6	Kayak	27.4515
TN6_4	TN	6	Kayak	26.448
TN6_4	TN	6	Kayak	26.7591
TN6_5	TN	6	Kayak	27.447
TN6_5	TN	6	Kayak	27.838
TN9_1	TN	9	Kayak	39.5439
TN9_1	TN	9	Kayak	Undetermined
TN9_2	TN	9	Kayak	Undetermined
TN9_2	TN	9	Kayak	Undetermined
TN9_3	TN	9	Kayak	Undetermined
TN9_3	TN	9	Kayak	Undetermined
TN9_4	TN	9	Kayak	Undetermined
TN9_4	TN	9	Kayak	34.4465
TN9_5	TN	9	Kayak	Undetermined
TN9_5	TN	9	Kayak	34.6933
TN15_1	TN	15	Kayak	38.6137
TN15_1	TN	15	Kayak	Undetermined
TN15_2	TN	15	Kayak	Undetermined
TN15_2	TN	15	Kayak	Undetermined
TN15_3	TN	15	Kayak	Undetermined
TN15_3	TN	15	Kayak	Undetermined
TN15_4	TN	15	Kayak	37.5038
TN15_4	TN	15	Kayak	Undetermined
TN15_5	TN	15	Kayak	Undetermined
TN15_5	TN	15	Kayak	Undetermined

## Sheet: Lys2
Sample Name	Treatment	Days
CC0_1	CC	0	Lys2	27.3054
CC0_1	CC	0	Lys2	27.0389
CC0_2	CC	0	Lys2	27.6931
CC0_2	CC	0	Lys2	27.9172
CC0_3	CC	0	Lys2	28.8715
CC0_3	CC	0	Lys2	28.7742
CC0_4	CC	0	Lys2	26.6333
CC0_4	CC	0	Lys2	26.653
CC0_5	CC	0	Lys2	28.6598
CC0_5	CC	0	Lys2	29.3882
CC6_1	CC	6	Lys2	26.3862
CC6_1	CC	6	Lys2	26.5282
CC6_2	CC	6	Lys2	29.218
CC6_2	CC	6	Lys2	29.3333
CC6_3	CC	6	Lys2	31.378
CC6_3	CC	6	Lys2	32.3389
CC6_4	CC	6	Lys2	31.9713
CC6_4	CC	6	Lys2	31.426
CC6_5	CC	6	Lys2	28.3964
CC6_5	CC	6	Lys2	28.2128
CC9_1	CC	9	Lys2	29.4727
CC9_1	CC	9	Lys2	29.4877
CC9_2	CC	9	Lys2	28.2812
CC9_2	CC	9	Lys2	28.2805
CC9_3	CC	9	Lys2	31.0994
CC9_3	CC	9	Lys2	32.1757
CC9_4	CC	9	Lys2	30.0055
CC9_4	CC	9	Lys2	30.0933
CC9_5	CC	9	Lys2	32.1675
CC9_5	CC	9	Lys2	32.8091
CC15_1	CC	15	Lys2	23.135
CC15_1	CC	15	Lys2	23.2196
CC15_2	CC	15	Lys2	30.0967
CC15_2	CC	15	Lys2	30.219
CC15_3	CC	15	Lys2	29.1878
CC15_3	CC	15	Lys2	28.789
CC15_4	CC	15	Lys2	22.2909
CC15_4	CC	15	Lys2	22.3067
CC15_5	CC	15	Lys2	27.0036
CC15_5	CC	15	Lys2	27.4951
CN6_1	CN	6	Lys2	27.8688
CN6_1	CN	6	Lys2	28.6637
CN6_2	CN	6	Lys2	28.9482
CN6_2	CN	6	Lys2	29.7708
CN6_3	CN	6	Lys2	30.3199
CN6_3	CN	6	Lys2	31.546
CN6_4	CN	6	Lys2	31.3727
CN6_4	CN	6	Lys2	32.609
CN6_5	CN	6	Lys2	29.54
CN6_5	CN	6	Lys2	29.5916
CN9_1	CN	9	Lys2	30.6269
CN9_1	CN	9	Lys2	31.6302
CN9_2	CN	9	Lys2	32.6675
CN9_2	CN	9	Lys2	31.9729
CN9_3	CN	9	Lys2	25.6648
CN9_3	CN	9	Lys2	25.6804
CN9_4	CN	9	Lys2	27.9135
CN9_4	CN	9	Lys2	27.8135
CN9_5	CN	9	Lys2	29.8613
CN9_5	CN	9	Lys2	30.5776
CN15_1	CN	15	Lys2	25.2488
CN15_1	CN	15	Lys2	25.2228
CN15_2	CN	15	Lys2	24.6201
CN15_2	CN	15	Lys2	24.6567
CN15_3	CN	15	Lys2	28.8032
CN15_3	CN	15	Lys2	29.2243
CN15_4	CN	15	Lys2	24.3168
CN15_4	CN	15	Lys2	24.2771
CN15_5	CN	15	Lys2	26.4729
CN15_5	CN	15	Lys2	26.1507
TC0_1	TC	0	Lys2	30.7896
TC0_1	TC	0	Lys2	31.1625
TC0_2	TC	0	Lys2	30.8301
TC0_2	TC	0	Lys2	30.6918
TC0_3	TC	0	Lys2	31.5483
TC0_3	TC	0	Lys2	31.9716
TC0_4	TC	0	Lys2	32.2552
TC0_4	TC	0	Lys2	31.0937
TC0_5	TC	0	Lys2	29.4152
TC0_5	TC	0	Lys2	29.77
TC6_1	TC	6	Lys2	25.551
TC6_1	TC	6	Lys2	25.5308
TC6_2	TC	6	Lys2	29.5988
TC6_2	TC	6	Lys2	29.9685
TC6_3	TC	6	Lys2	28.8309
TC6_3	TC	6	Lys2	28.3837
TC6_4	TC	6	Lys2	27.9421
TC6_4	TC	6	Lys2	28.102
TC6_5	TC	6	Lys2	26.5023
TC6_5	TC	6	Lys2	26.2651
TC9_1	TC	9	Lys2	31.3334
TC9_1	TC	9	Lys2	31.6099
TC9_2	TC	9	Lys2	30.197
TC9_2	TC	9	Lys2	30.4468
TC9_3	TC	9	Lys2	30.246
TC9_3	TC	9	Lys2	30.9961
TC9_4	TC	9	Lys2	30.311
TC9_4	TC	9	Lys2	30.8592
TC9_5	TC	9	Lys2	31.5164
TC9_5	TC	9	Lys2	30.5124
TC15_1	TC	15	Lys2	25.9206
TC15_1	TC	15	Lys2	26.1187
TC15_2	TC	15	Lys2	24.5157
TC15_2	TC	15	Lys2	24.5373
TC15_3	TC	15	Lys2	26.0337
TC15_3	TC	15	Lys2	26.1412
TC15_4	TC	15	Lys2	30.1896
TC15_4	TC	15	Lys2	28.8941
TC15_5	TC	15	Lys2	25.4349
TC15_5	TC	15	Lys2	25.6591
TN6_1	TN	6	Lys2	26.7682
TN6_1	TN	6	Lys2	26.7866
TN6_2	TN	6	Lys2	26.2677
TN6_2	TN	6	Lys2	26.3959
TN6_3	TN	6	Lys2	27.5322
TN6_3	TN	6	Lys2	28.3254
TN6_4	TN	6	Lys2	27.3275
TN6_4	TN	6	Lys2	27.5133
TN6_5	TN	6	Lys2	27.0776
TN6_5	TN	6	Lys2	26.8962
TN9_1	TN	9	Lys2	30.2444
TN9_1	TN	9	Lys2	30.2358
TN9_2	TN	9	Lys2	29.0078
TN9_2	TN	9	Lys2	28.8955
TN9_3	TN	9	Lys2	29.8919
TN9_3	TN	9	Lys2	29.3928
TN9_4	TN	9	Lys2	31.8476
TN9_4	TN	9	Lys2	32.3768
TN9_5	TN	9	Lys2	31.5474
TN9_5	TN	9	Lys2	30.4618
TN15_1	TN	15	Lys2	27.6481
TN15_1	TN	15	Lys2	27.8851
TN15_2	TN	15	Lys2	26.7967
TN15_2	TN	15	Lys2	27.3932
TN15_3	TN	15	Lys2	26.2459
TN15_3	TN	15	Lys2	26.419
TN15_4	TN	15	Lys2	24.5782
TN15_4	TN	15	Lys2	24.643
TN15_5	TN	15	Lys2	28.3459
TN15_5	TN	15	Lys2	28.5453

[truncated: 8 more sheets: PGRPSC4300, PKA-C1, PKA-R1, Spaetzle, Toll, Hopscotch, DWV, Nosema]
